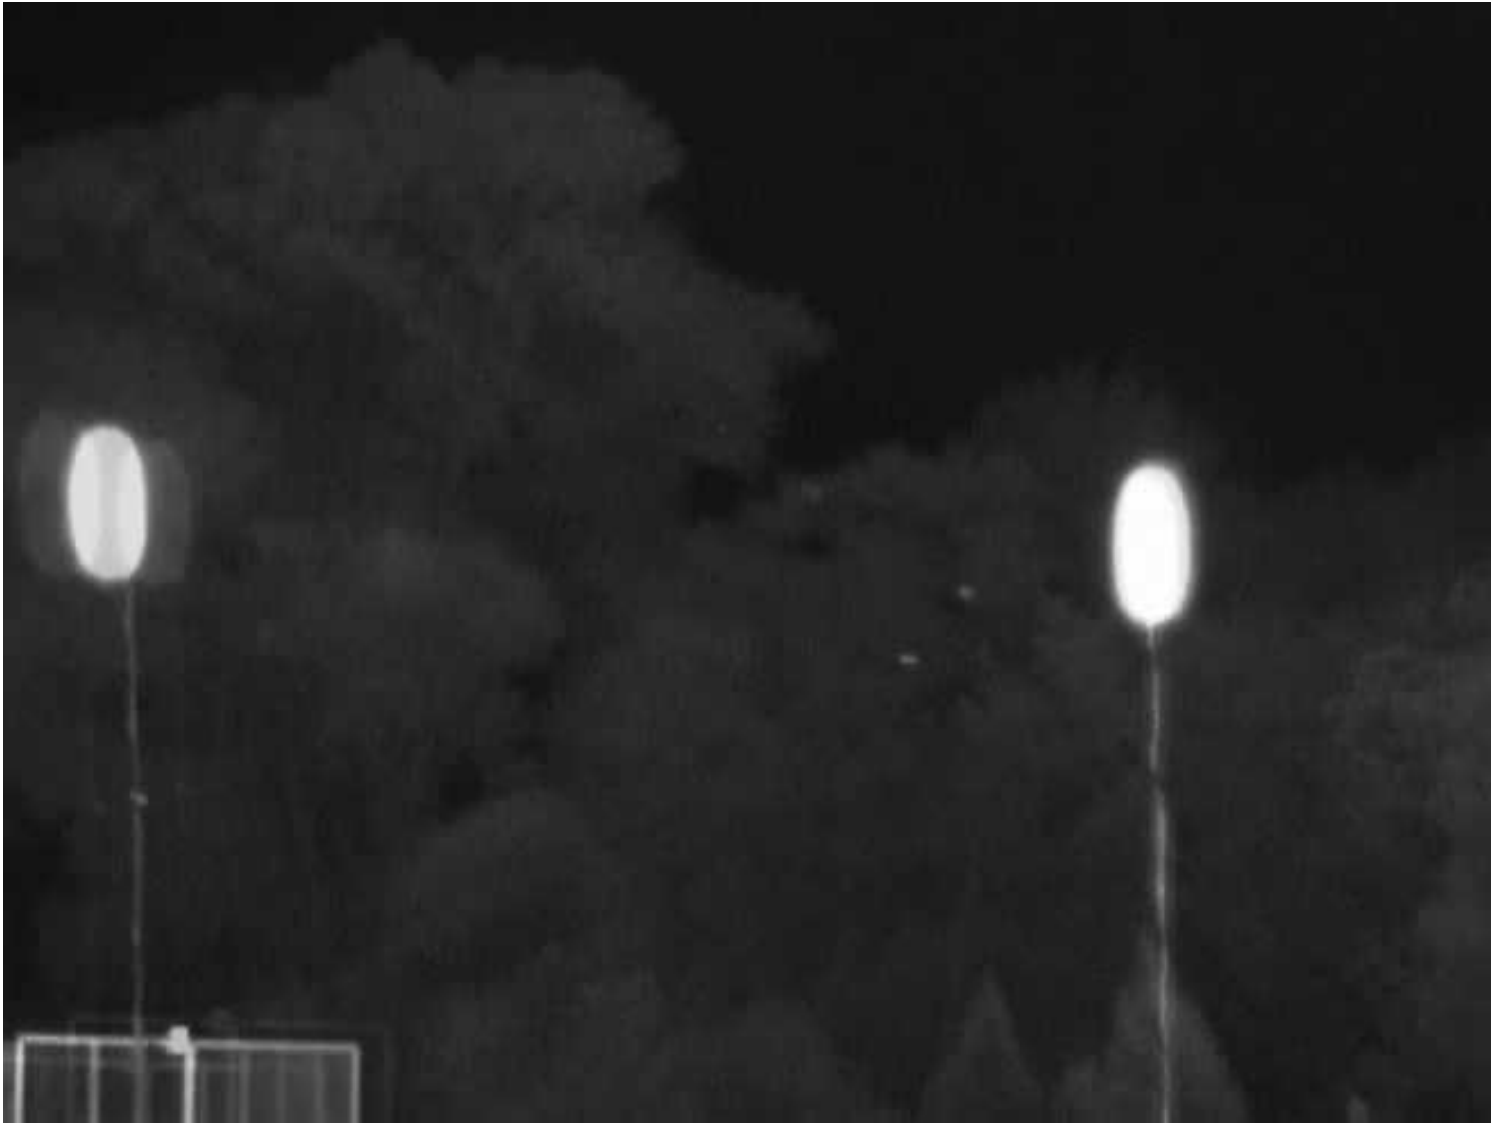

**Movie 1.** Field video of a Grote's tiger moth (*Bertholdia trigona*) jamming the sonar of a *Myotis* bat. The field of view at the beginning of the movie shows the full frame of the camera; the image is then zoomed in to the area of the attack to more clearly see the interaction. Note the moth's clicking, which begins soon after the initiation of the dive. Video and audio are slowed by 10×.

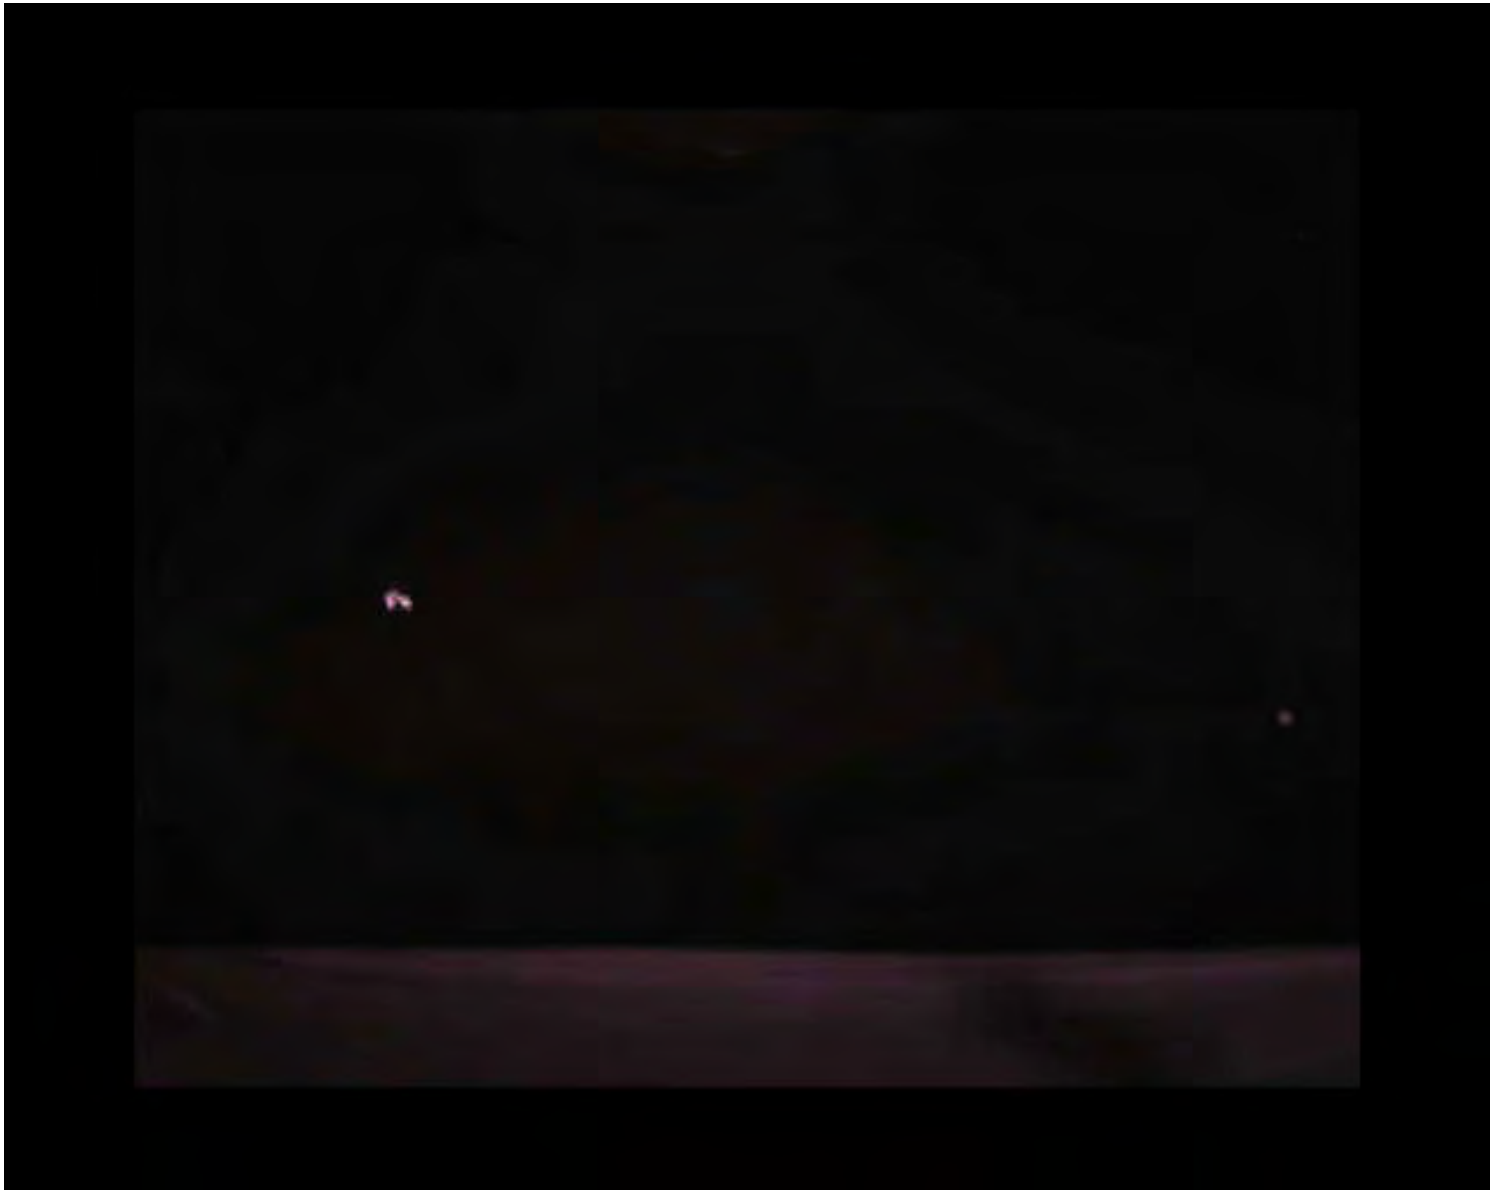

**Movie 2.** A Grote's tiger moth (*Bertholdia trigona*) jams the sonar of an attacking big brown bat (*Eptesicus fuscus*). Note the moth's clicking begins just after its power dive. Video was recorded at 1000 frames s<sup>-1</sup> and is slowed down 30×. This video was recorded under captive conditions.
